# Supplementary material
Source: publisher figshare collection journal article supplement (https://frontiersin.figshare.com/ndownloader/files/13722821)
Supplement: Supplementary file [file 13722821]

a)

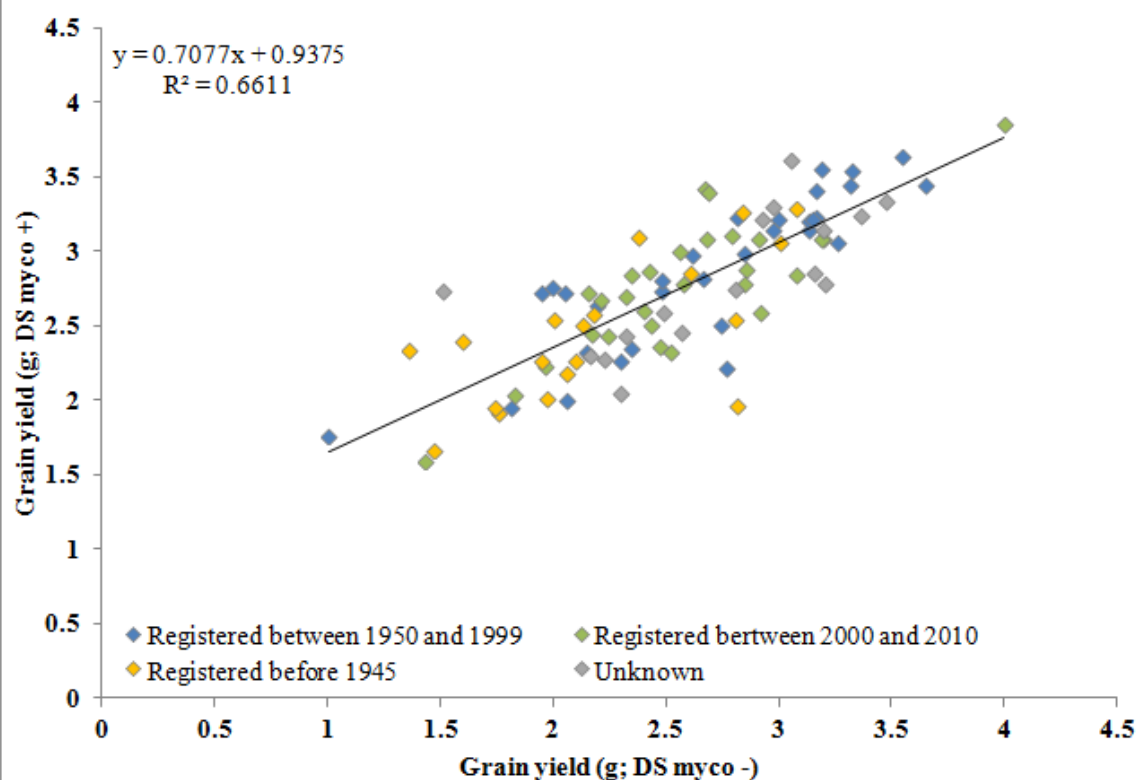

b)

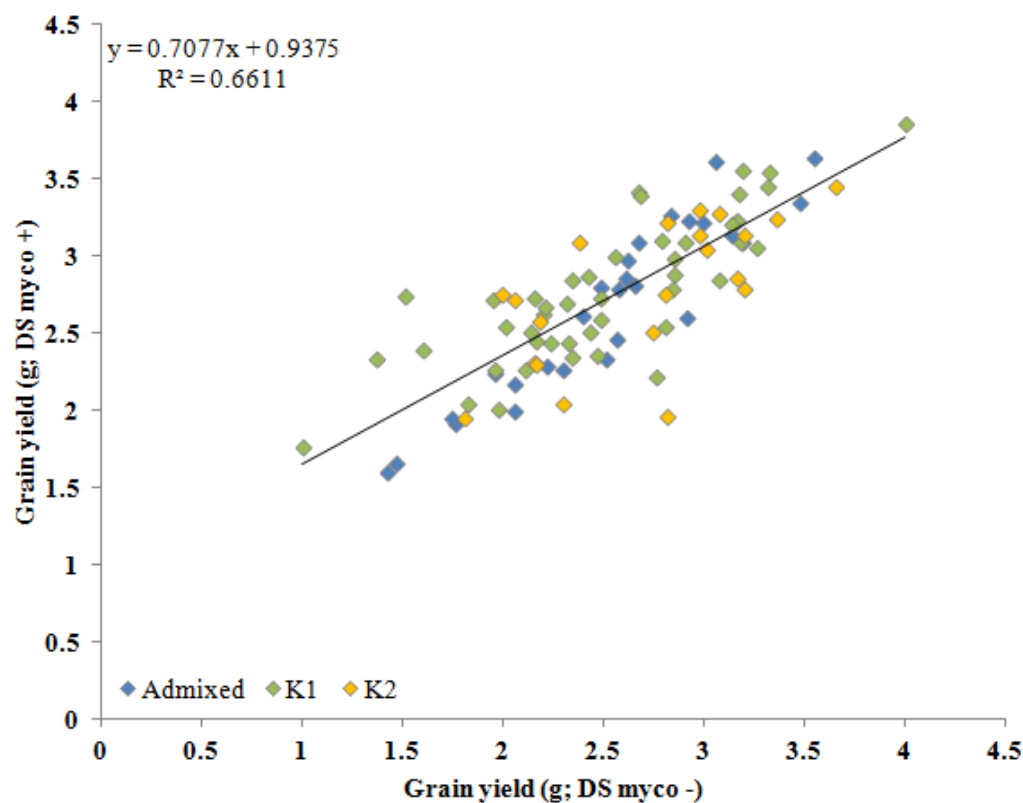

**Suppl. figure 2:** Linear regression of grain yield (GY) under drought stress conditions in the presence of mycorrhizae (DS myco +) against grain yield (GY) under drought stress conditions in the absence of mycorrhizae (DS myco -) for the 94 genotypes. Genotypes were assigned to groups according to the a) year of release and b) structure grouping. K1: Structure group 1, K2: Structure group 2 (For details please see Lehnert *et al.* 2017).
